# Supplementary material for: Acid Sphingomyelinase Downregulation Enhances Mitochondrial Fusion and Promotes Oxidative Metabolism in a Mouse Model of Melanoma
Source: MDPI journal article supplement (doi:10.3390/cells9040848), 2020-03-31
Supplement: s1 [file s1]

## Supplementary Material: Acid sphingomyelinase downregulation enhances mitochondrial fusion and promotes oxidative metabolism in a mouse model of melanoma

Marco Coazzoli, Alessandra Napoli, Paulina Roux-Biejat, Clara De Palma, Claudia Moscheni, Elisabetta Catalani, Silvia Zecchini, Vincenzo Conte, Matteo Giovarelli, Sonia Caccia, Patrizia Procacci, Davide Cervia, Emilio Clementi, Cristiana Perrotta

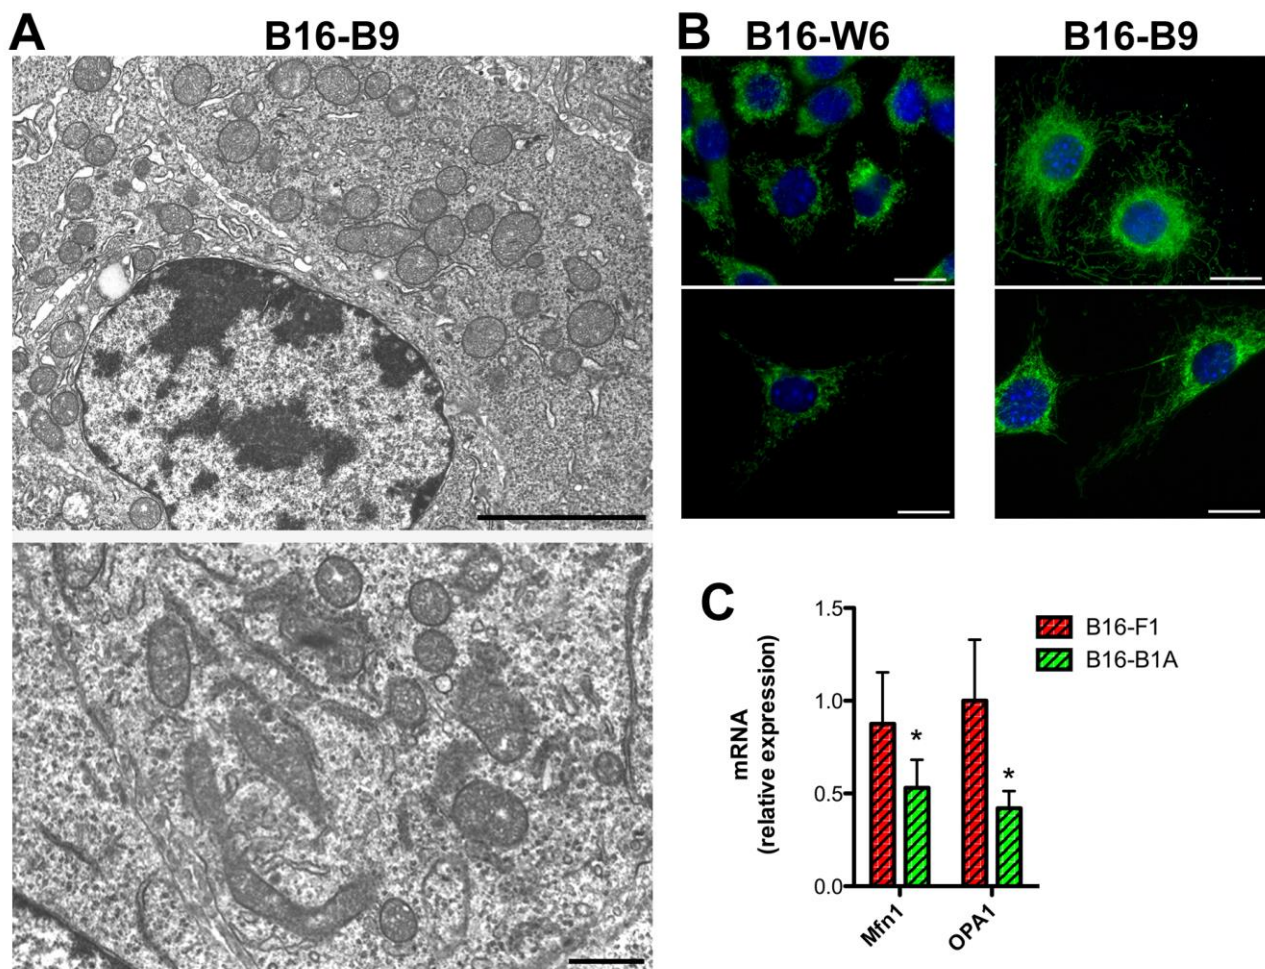

**Supplementary Figure S1.** A-SMase expression determines mitochondrial shape in vivo and in vitro. **A.** Transmission electron microscopy showing mitochondria in B16-B9 tumours. Upper panels scale bar = 5  $\mu$ m. Lower panels scale bar = 1  $\mu$ m. **B.** Representative fluorescence micrographs of cyclophilin f and Dapi staining of B16-B9 and B16-W6 cells. Scale bar = 20  $\mu$ m. **C.** qPCR of Mfn1, and OPA1 on mRNA extract from B16-F1 and B16-B1A cells ( $n = 6$ ). \* $p < 0.05$  vs B16-F1.

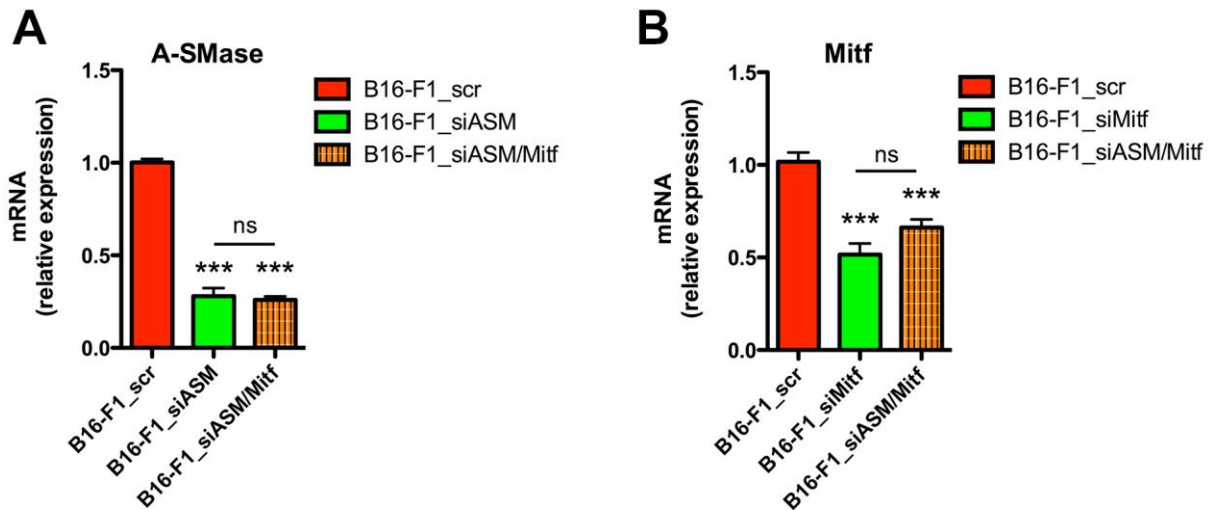

**Supplementary Figure S2.** Control of A-SMase and Mitf double knockdown. B16-F1 cells were transiently transfected with: the scrambled siRNA (B16-F1\_scr), an A-SMase siRNA (B16-F1\_siASM), a Mitf siRNA (B16-F1\_siMitf) and a combination of the two siRNA (B16-F1\_siASM/Mitf). **A.** A-SMase expression was evaluated by qPCR ( $n \geq 6$ ). \*\*\* $p < 0.001$  vs B16-F1\_scr. **B.** Mitf expression was evaluated by qPCR ( $n \geq 6$ ). \*\*\* $p < 0.001$  vs B16-F1\_scr.

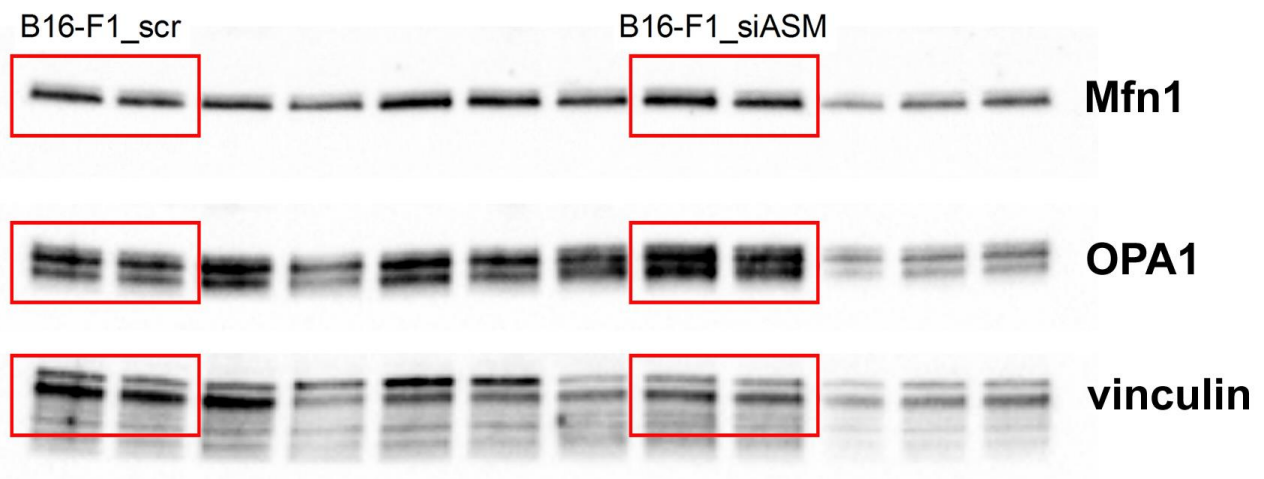

**Supplementary Figure S3.** Uncropped western blotting of the images shown in Figure 3B.
